# Supplementary material for: Potential and utilization of thermophiles and thermostable enzymes in biorefining
Source: PubMed Central journal article supplement (PMC1851020; doi:10.1186/1475-2859-6-9), 2007-03-15
Supplement: 1475-2859-6-9-S2.pdf [file 1475-2859-6-9-S2.pdf]

| Enzyme                      | Origin                                        | T <sub>opt</sub> /°C | pH <sub>opt</sub> | Stability                                                | Refs              |
|-----------------------------|-----------------------------------------------|----------------------|-------------------|----------------------------------------------------------|-------------------|
| <b>α-Amylase</b>            | <i>Bacillus licheniformis</i>                 | 76                   | 5-8               | Requires calcium for stability                           | [244]             |
| (engineered)                | <i>Bacillus licheniformis</i>                 | 90-95                | 4-8               | Stable at 85-90°C<br>t <sub>1/2</sub> (95°C): 25-100 min | [245, 246]        |
| <i>Multifect AA 21L®</i>    | <i>Bacillus licheniformis</i><br>(engineered) | N/A                  | 5.5-5.8           | Does not require calcium                                 | Genencor          |
|                             | <i>Bacillus</i> sp. ANT-6                     | 80                   | 10.5              |                                                          | [247]             |
| <i>Termamyl®</i>            | <i>Bacillus</i>                               | 82-86                | 5.7-6.0           | Calcium-independent                                      | Novozymes         |
| <i>/Liquozyme®</i>          | <i>stearothermophilus</i>                     |                      |                   |                                                          |                   |
|                             | <i>Bacillus</i>                               | 100                  | 8                 | t <sub>1/2</sub> (100 °C): 3 h                           | [248]             |
|                             | <i>thermooleovorans</i>                       |                      |                   | calcium-independent                                      |                   |
|                             | <i>Pyrococcus furiosus</i>                    | 100                  | 5-6               | Calcium-independent                                      | [249]             |
|                             |                                               |                      |                   | t <sub>1/2</sub> (98 °C): 13 h                           |                   |
|                             | <i>Pyrococcus woesei</i>                      | 100                  | 5.5               | Stable at 70-90°C for >6 h                               | [250]             |
|                             |                                               |                      |                   | t <sub>1/2</sub> (110 °C): 4-5 h                         |                   |
|                             |                                               |                      |                   | Slightly stabilized by Ca <sup>2+</sup>                  |                   |
|                             | <i>Thermococcus</i>                           | 75-85                | 5.0-5.5           | N/A                                                      | [251]             |
|                             | <i>hydrothermalis</i>                         |                      |                   |                                                          |                   |
| <i>Valley "Ultra-thin™"</i> | N/A                                           | 105                  | 4.5               |                                                          | [252],<br>Diversa |
| <b>β-Amylase</b>            | <i>Thermotoga maritima</i>                    | 95                   | 5                 | t <sub>1/2</sub> (90°C): ~30 min                         | [253]             |
|                             | <i>Thermoanaerobacterium</i>                  | 75                   | 5.5               | Stable for 2 h at 70°C                                   | [254]             |
|                             | <i>thermosulfurigenes</i>                     |                      |                   | Stability enhances with<br>substrate or Ca <sup>2+</sup> |                   |
| <b>Amylomaltase</b>         | <i>Pyrobaculum aerophilium</i>                | 95                   | 6.7               |                                                          | [86]              |
|                             | IM2                                           |                      |                   |                                                          |                   |
|                             | <i>Thermus aquaticus</i>                      | 75                   | 5.5-6.0           | t <sub>1/2</sub> (80 °C): 24 h                           | [87, 97]          |

|                               |                                                 |                                          |                                              |                                                                                          |       |
|-------------------------------|-------------------------------------------------|------------------------------------------|----------------------------------------------|------------------------------------------------------------------------------------------|-------|
| <b>Amylopullulanase</b>       | <i>Desulfurococcus mucosus</i>                  | 85                                       | 5                                            | $t_{1/2}$ (85°C): 50 min                                                                 | [173] |
|                               | <i>Geobacillus thermoleovorans</i>              | 80                                       | ~7                                           | $t_{1/2}$ (100°C): 2 h (1,4-activity),<br>3.5 h (1,6-activity); $Ca^{2+}$<br>independent | [216] |
|                               | <i>Pyrococcus furiosus</i>                      | 100-120                                  | 5.5                                          | $Ca^{2+}$ enhances thermoactivity<br>and thermostability                                 | [255] |
|                               | <i>Thermococcus hydrothermalis</i>              | 80-100<br>105-115<br>( $Ca^{2+}$ )       | 5.0-5.75                                     | N/A                                                                                      | [256] |
|                               | <i>Thermococcus litoralis</i>                   | 90-100                                   | 5.5                                          | $Ca^{2+}$ enhances thermoactivity<br>and thermostability                                 | [255] |
| <b>Branching enzyme</b>       | <i>Aquifex aeolicus</i>                         | 80                                       | 7.5                                          | 70% activity after 2 h at 90°C                                                           | [257] |
|                               | <i>Rhodothermus obamensis</i>                   | 65                                       | 6.0-6.5                                      | $t_{1/2}$ (80 °C): 16 h                                                                  | [169] |
|                               | <i>Thermococcus kodakaraensis</i> KOD1          | 70                                       | 7                                            | Stable at 90°C (for several h)                                                           | [258] |
| <b>CGTase</b>                 | <i>Anaerobranca gottschalkii</i>                | 65                                       | 6-9                                          | Needs $Ca^{2+}$ and high substrate<br>conc for stability                                 | [259] |
|                               | <i>alkalophilic Bacillus</i>                    | 60                                       | 6                                            | N/A                                                                                      | [218] |
|                               | (engineered) <i>Bacillus circulans</i>          |                                          |                                              | $t_{1/2}$ (60°C): 9-56 min                                                               | [260] |
|                               | <i>Bacillus stearothermophilus</i> ET1          | 80                                       | 6.0                                          | Stability enhanced by $Ca^{2+}$<br>$T_m=81^\circ C$                                      | [261] |
| <b>4-<math>\alpha</math>-</b> | <i>Thermoanaerobacterium thermosulfurigenes</i> | 80-85 <sup>C</sup><br>90-95 <sup>H</sup> | 4.5-7.0 <sup>C</sup><br>4.0-4.5 <sup>H</sup> | Calcium and starch enhances<br>stability<br>$t_{1/2}$ (100°C): 30 min                    | [262] |
|                               | <i>Thermococcus kodakaraensis</i>               | 80<br>85-90 ( $Ca^{2+}$ )                | 5.5-6.0                                      | $t_{1/2}$ (100°C): 20 min                                                                | [263] |
|                               | <i>Thermotoga maritima</i>                      | 70                                       | 7-8                                          | $t_{1/2}$ (80 °C): 3 h                                                                   | [264] |

| <b>Glucanotransferase</b>            |                                                    |         |         |                                                                    |                     |
|--------------------------------------|----------------------------------------------------|---------|---------|--------------------------------------------------------------------|---------------------|
|                                      | <i>Pyrococcus kodakaraensis</i>                    | 100     | 6-8     | 90% activity after 30 min at 100°C                                 | [265]               |
| <b>Glucoamylase</b>                  | <i>Clostridium thermosaccharolyticum</i>           | 70      | 5       | 90% activity after 6 h at 70°C; Ca <sup>2+</sup> -independent      | [266]               |
|                                      | <i>Sulfolobus solfataricus</i>                     | 90      | 5.5-6.0 | N/A                                                                | [85]                |
|                                      | <i>Thermoanaerobacterium thermosaccharolyticum</i> | 40-65   | 4.0-5.5 | Stable at optimum temp for 8 h                                     | [267]               |
|                                      | <i>Thermomyces lanuginosus</i>                     | 70      | 5       | t <sub>1/2</sub> (60°C): 7.3 h<br>t <sub>1/2</sub> (70°C): 30 min  | [268, 269]          |
| <b>α-Glucosidase</b>                 | <i>Pyrococcus furiosus</i>                         | 105-115 | 5-6     | t <sub>1/2</sub> (98°C): 48 h                                      | [270]               |
|                                      | <i>Thermococcus hydrothermalis</i>                 | 100     | 5.5     | N/A                                                                | [271]               |
| <b>Maltogenic α-amylase</b> Novamyl® | <i>Bacillus stearothermophilus</i>                 | 62      | 5       | N/A                                                                | [220],<br>Novozymes |
| <b>Maltosyl transferase</b>          | <i>Thermotoga maritima</i>                         | 85-90   | 6.5     | Stable at 80°C for 2 h                                             | [272]               |
| <b>Pullulanase</b>                   | <i>Anaerobranca gottschalkii</i>                   | 70      | 8       | t <sub>1/2</sub> (70°C): 22 h<br>Ca <sup>2+</sup> -independent     | [273]               |
|                                      | <i>Fervidobacterium pennavorans</i>                | 85      | 6.0     | t <sub>1/2</sub> (80°C): 2 h<br>t <sub>1/2</sub> (90°C): 5 min     | [274]               |
|                                      | <i>Pyrococcus woesei</i>                           | 100     | 6.0     | t <sub>1/2</sub> (110°C): 7-20 min                                 | [275]               |
|                                      | <i>Rhodothermus marinus</i>                        | 80°C    | 6.5-7.0 | t <sub>1/2</sub> (85°C): 30 min                                    | [276]               |
|                                      | <i>Thermococcus hydrothermalis</i>                 | 95°C    | N/A     | t <sub>1/2</sub> (95°C): > 8 h<br>t <sub>1/2</sub> (105°C): 60 min | [222]               |
|                                      | <i>Thermotoga maritima</i>                         | 90      | 5.9     | t <sub>1/2</sub> (90°C): 3.5 h                                     | [277]               |

N/A: not available; <sup>C</sup> Cyclization; <sup>H</sup> Hydrolysis
