# Supplementary material for: Potential and utilization of thermophiles and thermostable enzymes in biorefining
Source: Springer Nature journal article supplement (doi:10.1186/1475-2859-6-9), 2007-03-15
Supplement: 12934_2007_252_MOESM3_ESM.pdf [file 12934_2007_252_MOESM3_ESM.pdf]

| Enzyme                                              | Origin                                                             | T <sub>opt</sub>             | pH <sub>opt</sub>       | Stability                                                | Reference             |
|-----------------------------------------------------|--------------------------------------------------------------------|------------------------------|-------------------------|----------------------------------------------------------|-----------------------|
| <b>Cellulases</b>                                   | <i>Chrysosporium</i>                                               | N/A                          | 5.0-5.5                 | Stable at 50°C for 24 h,                                 | [225]                 |
| Cellobiohydrolase                                   | <i>lucknowense</i>                                                 |                              |                         | t <sub>1/2</sub> (65°C): 3 h                             |                       |
| <i>CBH1A</i>                                        | <i>Talaromyces</i><br><i>emersonii</i>                             | 78                           | 3.6                     | N/A                                                      | [278]                 |
| β-1,4-Endoglucanase                                 | N/A                                                                | 55-<br>60°C                  | N/A                     | N/A                                                      | THOR                  |
| <i>THORZYM™</i>                                     | <i>Thermotoga</i><br><i>maritima MSB8</i>                          | 95°C                         | 6.0-7.5                 | 90 % activity after 6h at<br>80°C.                       | [279]                 |
| (endocellulase A and<br>B)                          | <i>Thermotoga</i><br><i>neapolitana</i>                            | 95°C<br>(A),<br>106°C<br>(B) | 6.0 (A),<br>6.0-6.6 (B) | CelB is stable 130 min<br>at 106°C.                      | [280]                 |
| β-1,4-Endoglucanase<br>(β-1,(3)4-<br>Endoglucanase) | <i>Rhodothermus</i><br><i>marinus</i>                              | 90°C                         | 6-8                     | t <sub>1/2</sub> (90°C): 3 h, T <sub>m</sub> at<br>120°C | [281]                 |
| β-Glucosidase                                       | <i>Thermotoga</i><br><i>maritima</i>                               | N/A                          | N/A                     | Stable >4 years at 4°C                                   | Megazyme              |
| (Bgl3B)                                             | <i>Thermotoga</i><br><i>neapolitana</i><br>(DSM4359)               | 90°C                         | 5-6                     | T <sub>m</sub> at 90°C                                   | [282]                 |
| (BglB)                                              | <i>Thermotoga</i><br><i>neapolitana</i><br>(strain Z2706-<br>MC24) | 90°C                         | 6-7                     | stable 3h at 90°C                                        | [283]                 |
| (Bgl1A)                                             | <i>Thermotoga</i><br><i>neapolitana</i>                            | 100°C                        | 5-6                     | T <sub>m</sub> at 102°C                                  | Turner P,<br>Nordberg |

|                       |                                                |               |         |                                                                    |                                    |
|-----------------------|------------------------------------------------|---------------|---------|--------------------------------------------------------------------|------------------------------------|
|                       |                                                |               |         |                                                                    | Karlsson E,<br>unpublished<br>data |
|                       | <i>Pyrococcus furiosus</i>                     | 102-<br>105°C | N/A     | t <sub>1/2</sub> (100°C): 85 h                                     | [284]                              |
| <b>Hemicellulases</b> |                                                |               |         |                                                                    |                                    |
| α-arabinofuranosidase | <i>Bacillus pumilus</i>                        | 55            | 7       | t <sub>1/2</sub> (75°C): 135 min                                   | [285]                              |
|                       | <i>Geobacillus<br/>stearothermophilus</i>      | 70            | 7       | t <sub>1/2</sub> (70°C): 75 min (pH<br>7)                          | [223]                              |
|                       | <i>Rhodothermus<br/>marinus</i>                | 85            | 5.5-7.0 | t <sub>1/2</sub> (85°C): 8.3 h, t <sub>1/2</sub><br>(90°C): 17 min | [286]                              |
|                       | <i>Thermobacillus<br/>xylanilyticus</i>        | 75            | 5.6-6.2 | t <sub>1/2</sub> (90°C): 2 h (pH 8)                                | [287]                              |
| β-mannanase           | <i>Thermotoga<br/>maritima</i>                 | 90°C          | 7       | Stable >2 years at 4°C                                             | Megazyme,<br>[288]                 |
|                       | <i>Rhodothermus<br/>marinus</i>                | 85°C          | 5-7     | 25 % of initial activity<br>after 1h 90°C                          | [289]                              |
| β-mannosidase         | <i>Thermotoga<br/>neapolitana</i>              | 92            | 7.0     | t <sub>1/2</sub> (90°C): 38 min                                    | [288]                              |
| xylanase              | <i>Rhodothermus<br/>marinus</i>                | 85°C          | 7       | T <sub>m</sub> at 93°C, in presence<br>of Ca <sup>2+</sup>         | [290]                              |
|                       | <i>Thermotoga<br/>maritima</i>                 | 95°C          | 5-8     | Stable at 100°C for<br>several hours                               | [291]                              |
|                       | <i>MULTIFECT CX 12L®<br/>Trichoderma resei</i> | 55            | 5       | N/A                                                                | [242]                              |
|                       | <i>Luminase™</i>                               | N/A           | 40-70   | 6-8                                                                | N/A<br>Diversa                     |
| Xylanase              | <i>Bacillus halodurans</i>                     | 70            | 9.0-9.5 | t <sub>1/2</sub> (65°C): > 3h                                      | [292]                              |
| <b>Pectinases</b>     |                                                |               |         |                                                                    |                                    |

|                             |                                 |    |         |                                       |       |
|-----------------------------|---------------------------------|----|---------|---------------------------------------|-------|
| $\alpha$ -Galactosidase     | <i>Thermotoga neapolitana</i>   | 99 | 7.0     | $t_{1/2}$ (100°C): 3 min              | [293] |
| Polygalacturonate hydrolase | <i>Sporotrichum thermophile</i> | 55 | 7       | $t_{1/2}$ (65°C): 4 h                 | [143] |
| $\alpha$ -L-rhamnosidase    | <i>Clostridium stercorarium</i> | 60 | N/A     | N/A                                   | [142] |
| <i>RhmA</i>                 | <i>Thermomicrobium</i> sp.      | 70 | 7.9     | 60°C, 24 h $\Rightarrow$ 20% activity | [138] |
| <i>RhmB</i>                 | <i>Thermomicrobium</i> sp.      | 70 | 5.0-6.9 | 60°C, 24 h $\Rightarrow$ 20% activity | [138] |

N/A: not available
